Date: December 19, 2019

1 **Title:** Empirical dynamic modeling reveals ecological drivers of dengue dynamics

2 **Authors:** Nicole Nova<sup>1\*</sup>, Ethan R. Deyle<sup>2,3</sup>, Marta S. Shocket<sup>1,4</sup>,

3 Andrew J. MacDonald<sup>1,5</sup>, Marissa L. Childs<sup>6</sup>, Martin Rypdal<sup>7</sup>,

4 George Sugihara<sup>2</sup>, and Erin A. Mordecai<sup>1</sup>

5 **Affiliations:** <sup>1</sup>Department of Biology, Stanford University, Stanford, CA, USA.

6 <sup>2</sup>Scripps Institution of Oceanography, University of California San

7 Diego, La Jolla, CA, USA.

8 <sup>3</sup>Department of Biology, Boston University, Boston, MA, USA.

9 <sup>4</sup>Department of Ecology and Evolutionary Biology, University of

10 California, Los Angeles, CA, USA.

11 <sup>5</sup>Earth Research Institute & Bren School of Environmental Science and

12 Management, University of California Santa Barbara, Santa Barbara,

13 CA, USA.

14 <sup>6</sup>Emmett Interdisciplinary Program in Environment and Resources,

15 Stanford University, Stanford, CA, USA.

16 <sup>7</sup>Department of Mathematics and Statistics, UiT The Arctic University

17 of Norway, Tromsø, Norway.

18 \*Correspondence email: [nicole.nova@stanford.edu](mailto:nicole.nova@stanford.edu)

19 **Keywords:** Arbovirus, causality, climate, dengue, empirical dynamic modeling,

20 mosquito-borne disease, rainfall, susceptible population size, temperature.

Date: December 19, 2019

## 21 **Abstract**

22 Understanding ecological drivers of mosquito-borne disease is an ongoing public  
 23 health priority. Previous experiments and mechanistic models suggest mosquito-  
 24 borne disease transmission involves complex nonlinear interactions between  
 25 climate and population dynamics. This makes detecting environmental disease  
 26 drivers at the population level challenging. By analyzing incidence data, estimated  
 27 susceptible population size, and climate data with methods based on nonlinear time  
 28 series analysis, collectively referred to as empirical dynamic modeling (EDM), we  
 29 identified drivers and their interactive effects on dengue dynamics in San Juan,  
 30 Puerto Rico. Estimated susceptible population size was the strongest causal driver  
 31 of dengue incidence, and climatic forcing became important above a certain  
 32 susceptible population size (temperature and rainfall having net positive and  
 33 negative effects, respectively). Our EDM protocol for measuring and predicting how  
 34 climate and population dynamics interact to drive epidemics adds to a growing body  
 35 of empirical studies of complex, nonlinear systems embedded in changing  
 36 environments.

Date: December 19, 2019

## 37 INTRODUCTION

38 Mosquito-borne diseases, and dengue in particular, are (re)emerging globally and  
 39 spreading to higher latitudes in concert with globalization and climate change  
 40 (Kilpatrick & Randolph 2012; Ryan *et al.* 2019). Dengue virus—transmitted  
 41 primarily by urban *Aedes aegypti* (Kraemer *et al.* 2015b)—places half of the global  
 42 human population in 128 countries at infection risk (Brady *et al.* 2012; Kraemer *et*  
 43 *al.* 2019) and causes an estimated 390 million annual cases of dengue fever  
 44 worldwide (Bhatt *et al.* 2013). In the absence of effective vaccines or treatments  
 45 (Katzelnick *et al.* 2017b, a; Sridhar *et al.* 2018), public health agencies rely on vector  
 46 control to reduce dengue transmission (Erlanger *et al.* 2008). Effective vector  
 47 control measures require understanding the mechanisms linking vector ecology and  
 48 epidemics to better predict disease outbreaks—a major research challenge.  
 49 Previous prediction models used phenomenological and mechanistic equation-  
 50 based approaches (Johansson *et al.* 2009; Hii *et al.* 2012; Tran *et al.* 2013; Liu-  
 51 Helmersson *et al.* 2014; Morin *et al.* 2015; Mordecai *et al.* 2017; Johnson *et al.* 2018),  
 52 which may not fully capture interdependence between predictors. Here, we used a  
 53 mechanistic, equation-free, data-driven approach that accounts for interdependence  
 54 to determine ecological drivers and predict dengue outbreaks in an urban  
 55 environment.

56 Since mosquitoes have been shown to be sensitive to climate variables, such as  
 57 temperature and rainfall (Ibarra *et al.* 2013; Mordecai *et al.* 2019), it is reasonable to  
 58 ask whether temperature and rainfall are important drivers of dengue outbreaks.

Date: December 19, 2019

Although temperature directly affects mosquito and viral traits in laboratory experiments (Watts *et al.* 1987; Lambrechts *et al.* 2011), the relationship between temperature and dengue incidence in the field has been ambiguous. Thus, temperature-dependent models have had mixed success predicting the timing and magnitudes of epidemics (Hii *et al.* 2012; Johansson *et al.* 2016; Johnson *et al.* 2018). Similarly, the rainfall–dengue relationship is complex, because the effect of rainfall on mosquitoes depends on local breeding habitat and human behavior. In some settings, rainfall provides more container breeding habitat for mosquitoes, thus increasing mosquito abundance and dengue incidence (Ibarra *et al.* 2013). By contrast, low rainfall levels could also facilitate dengue transmission by promoting water storage that serves as standing-water habitat for mosquito breeding (Oliveira-lima *et al.* 2000). Further, heavy rainfall can reduce mosquito abundance by flushing out larvae (Koenraadt & Harrington 2008). The net effect of climate on dengue is a convolution of many different mechanisms of action, and the net outcome depends on specific context details. Moreover, as these details change, the climate–dengue relationship can change.

Previous studies using statistical (Johansson *et al.* 2009; Hii *et al.* 2012; Liu-Helmersson *et al.* 2014; Johnson *et al.* 2018) and mechanistic models (Tran *et al.* 2013; Morin *et al.* 2015; Mordecai *et al.* 2017) suggest that temperature and rainfall drive dengue transmission in the field. However, these models rely on parameter estimates from laboratory studies that are engineered to isolate single mechanisms of action, hence producing separable relationships between drivers and dengue, eliminating the complex interdependence at the population level. While laboratory

Date: December 19, 2019

studies provide robust validation of a mechanism (Lambrechts *et al.* 2011), the fixed relationships (correlations) taken from them do not necessarily translate into proper causal inference for nonlinear field systems (Sugihara *et al.* 2012). Even if causality exists between two variables in such a system, their correlation can switch signs during different time periods, resulting in a net correlation of zero (Deyle *et al.* 2016b). This temporal variation in the direction of correlation results from the nonlinear, state-dependent relationship between the variables (i.e., the importance or direction of one effect depends on the state of another variable). Conversely, even if two variables are consistently correlated, the association could be spurious due to a confounder—a third variable that drives two otherwise unrelated variables. Thus, covariation among variables poses a problem for identifying causal drivers. Both temperature and rainfall follow seasonal patterns in most regions of the world and often covary, making it difficult to separate their effects. Since ecological systems are often nonlinear with covarying drivers, it is difficult to isolate causality from field data.

Disease incidence also depends nonlinearly on (potentially climate-driven) transmission rates, because epidemic growth slows as the population of susceptible individuals is exhausted (Rypdal & Sugihara 2019). Thus, susceptible population size is an important driver of infectious disease dynamics (Anderson & May 1979; Kraemer *et al.* 2015a; Rypdal & Sugihara 2019). Variation in susceptible host availability may influence the effects of climate on dengue dynamics, but such interactive effects are difficult to detect in observational data. A lack of rigorous methods has hindered research on potential interdependence of climate and

Date: December 19, 2019

susceptible population size as drivers of dengue incidence. Because correlations are unreliable and variables are interdependent in nature, disentangling climate from other drivers in disease systems remains challenging (Thai & Anders 2011; Morin *et al.* 2013).

To overcome these challenges, we used empirical dynamic modeling (EDM) (Sugihara *et al.* 2012) to identify and model causal mechanisms driving dengue epidemics (see <http://tinyurl.com/EDM-intro> for an introduction). EDM differs from statistical and equation-based mechanistic models in two key ways. First, unlike statistical approaches where inferences about cause-and-effect relationships are based on fixed independent pairwise associations between system variables, EDM is based on reconstructing the system *dynamics*. This allows relationships among system variables to change through time to reflect that interactions among variables are changing. Second, unlike equation-based mechanistic models, EDM does not require assumptions about the functional form of the model, but instead reconstructs the dynamic attractor empirically from time series observations. An attractor is a geometric object (i.e., curve or manifold) that embodies the rules for how relationships among variables change with respect to each other through time depending on system state (specific location on the attractor). Like a set of equations, the geometric attractor encompasses the dynamics of a system, and thus can provide an agnostic (without an assumed set of equations) yet mechanistic understanding of the system that is empirically based. Although traditional equation-based mechanistic models can be constructed to account for nonlinearity, these approaches require *a priori* assumptions about the identity and the form of

Date: December 19, 2019

128 the causal relationships between variables that may not hold; however, EDM does  
129 not rely on such assumptions.

130 Here, we use EDM and a recent approach for inferring the susceptible population  
131 size from incidence data (Rypdal & Sugihara 2019) to answer three questions: (1)  
132 Do temperature, rainfall and/or inferred susceptible population size drive dengue  
133 incidence? (2) Can we predict dengue dynamics using climate data and inferred  
134 susceptible population size? (3) What is the approximate pattern of each causal  
135 relationship, and how is this relationship influenced by the other drivers? We  
136 examine the hypothesis that temperature and rainfall drive dengue incidence in  
137 complex ways that depend on susceptible population size. The EDM protocol  
138 presented here—identifying drivers, their predictive power, and state-dependent  
139 functional responses—can be applied to other complex, ecological systems.

Date: December 19, 2019

## METHODS

### Data and proxy for susceptible population size

We obtained time series of weekly observations of dengue incidence (total number of new dengue cases of all serotypes), temperature (°C), and rainfall (mm) in San Juan, Puerto Rico, 1990–2009 (Figure 1a–c) from the National Oceanic and Atmospheric Administration on November 10, 2016 (<http://dengueforecasting.noaa.gov/>). Direct measurement of susceptible populations is not feasible, so we used a recently developed method for inferring a proxy for the susceptible population size (Rypdal & Sugihara 2019). This method uses incidence data during the inter-outbreak period to construct a time series for the susceptible population. Although few dengue cases occur during the inter-outbreak period, incidence during this time contains information about the susceptible population size in the next outbreak. Because during an inter-outbreak period the disease system fluctuates around a disease-free equilibrium, a linear approximation of the incidence rate can be made where the coefficient, i.e., the leading eigenvalue,  $\lambda$ , scales linearly with the susceptible population size. If we assume a simple Susceptible-Infected-Recovered (SIR) model (Kermack & McKendrick 1927) for the disease system, then

$$\lambda = \beta \tilde{S} - \gamma \quad (1)$$

where  $\tilde{S}$  is a parameter representing the susceptible population size,  $\beta$  is the force of infection, and  $\gamma$  is the recovery rate. Thus,  $\lambda$  is linearly related to the proportion of



Date: December 19, 2019

160 the population that is susceptible over time, and can be used as a proxy (see  
161 Supporting Information for details).

162 Since the weekly incidence data are discrete we need to obtain the discrete-time  
163 eigenvalue  $\tilde{\lambda} = e^{\lambda \Delta t}$ . To infer  $\tilde{\lambda}$  from the weekly incidence data  $I(t)$ , we performed  
164 linear regression by fitting the statistical model  $I(t + \Delta t) = \tilde{\lambda} I(t)$  for 12 time  
165 points in a 12-week running window ( $\Delta t = 1$  week). The model is robust to the  
166 window size (Rypdal & Sugihara 2019). In the discrete case, when  $\tilde{\lambda} < 1$  the system  
167 is stable (inter-outbreak period) and when  $\tilde{\lambda} \geq 1$  then the system is unstable  
168 (outbreak period). Here, we treated the resulting time series of  $\tilde{\lambda}$  as a proxy for the  
169 susceptible population size, or “susceptibles index” for short (Figure 1d).

## 170 **Statistical analyses**

171 All analyses were conducted in R version 3.5.1 (R Development Core Team 2018).  
172 We performed pairwise cross-correlations on the time series to investigate time-  
173 lagged relationships between potential drivers (i.e., temperature, rainfall, and  
174 susceptibles index) and dengue incidence using the `tseries` package version 0.10-  
175 45 (Trapletti & Hornik 2018). We calculated the interannual mean to obtain the  
176 seasonal variability for each variable. Determining whether the variables follow  
177 seasonal trends is important for EDM analyses. Before performing EDM, we  
178 normalized each time series to zero mean and unit variance to remove  
179 measurement unit bias, ensuring the variables would be comparable and the  
180 attractor would not be distorted.

Date: December 19, 2019

## 181 **Empirical dynamic modeling (EDM)**

182 All EDM analyses were performed using package *rEDM* version 0.7.1 (Ye *et al.* 2018).  
 183 EDM includes approaches to infer a system’s mechanistic underpinnings and predict  
 184 its dynamics. EDM uses time series data of one or more variables to construct an  
 185 attractor in state space (Figure S1). This is called univariable or multivariable state  
 186 space reconstruction (SSR) for an attractor built using a single or multiple variables,  
 187 respectively. Properties of the attractor are assessed to examine characteristics of  
 188 the system (Deyle & Sugihara 2011).

189 EDM is sensitive to stochasticity, and should be applied in systems where there is  
 190 evidence of deterministic dynamics (Cummins *et al.* 2015). Some stochasticity is  
 191 allowed (e.g., there can be stochastic drivers in the system), but the system cannot  
 192 be entirely stochastic (i.e., there must be low-dimensional deterministic structure to  
 193 most variables). To test for low-dimensional deterministic dynamics we performed  
 194 univariable SSR for each variable and used *simplex projection* (Sugihara & May  
 195 1990)—a type of nearest neighbor regression—to check that the prediction skill  
 196 decreases with time to prediction, an indicator of deterministic dynamics (Figures  
 197 S2a and S4; see Supporting Information for details). To test for nonlinear state  
 198 dependence of a variable—the motivation behind EDM—we used the *S-map* test for  
 199 nonlinearity (Sugihara 1994) (Figures S2b,c and S5; see Supporting Information for  
 200 details).

Date: December 19, 2019

## 201 **EDM: Convergent cross-mapping**

202 We used an EDM approach called convergent cross-mapping (CCM) (Sugihara *et al.*  
 203 2012) to identify drivers of dengue incidence. If two variables are causally related,  
 204 then a multivariable attractor—where each variable in the system represents a  
 205 dimension that traces the dynamics of the system—can be semi-reconstructed using  
 206 lagged versions of just one of the variables (Figure S1). Based on Takens’ Theorem,  
 207 this univariable “shadow attractor” preserves the structural and dynamic properties  
 208 of the original multivariable attractor (Takens 1981) [see video  
 209 <https://youtu.be/QQwtrWBwxQg> (Sugihara *et al.* 2012)]. The concept behind CCM  
 210 is that if temperature causes dengue incidence, then information about temperature  
 211 will be embedded in the dynamics of dengue, such that the shadow attractor  
 212 produced using only dengue dynamics allows us to accurately reconstruct  
 213 temperature in the past. However, the converse scenario would not be true: since  
 214 dengue does not cause temperature, the shadow attractor constructed using  
 215 temperature data should not contain information to accurately reconstruct dengue  
 216 incidence (see Supporting Information for details).

217 The critical criterion for testing the existence of causality using CCM is checking that  
 218 the cross-mapping skill monotonically increases and plateaus (i.e., converges) with  
 219 the length of the response variable data series used in cross-mapping. The cross-  
 220 mapping skill,  $\rho$ , is the Pearson’s correlation coefficient between predicted driver  
 221 values using the univariable SSR of the response variable, and the observed driver  
 222 values. We used the Kendall’s  $\tau$  test as a significance test for convergence using the

Date: December 19, 2019

Kendall package version 2.2 (McLeod 2011). This test checks whether cross-mapping skill has a significant monotonic increasing trend. If  $\tau > 0$  then there is convergence (Grziwotz *et al.* 2018).

Based on the cross-correlation analyses (Figure S6), we applied a 9-week time lag between temperature and incidence, an averaged lag of 3–9 weeks for rainfall, and a 5-week lag for the susceptibles index. The rainfall variable is a proxy for standing water as mosquito breeding habitat, and thus we were interested in the accumulation of water over time. We refer to these as “ecological lags” and treat them as proxies for the time delay of cause-and-effect, since they account for the ecological processes in the causal chain of events (ecological lags are separate from lags used in SSR). These ecological time lags are consistent with results from other field studies, which showed that temperature and rainfall predict dengue cases 6–12 weeks ahead (Chen *et al.* 2010; Ibarra *et al.* 2013).

# **EDM: Null models**

For CCM, we assessed the strength of the evidence for causal effects of potential drivers on dengue using two null models that control for the seasonal trend observed in all variables (Figure 2). These null models address the sensitivity of CCM to periodic fluctuations (i.e., seasonality), which can make two variables appear to be causally linked when instead they are simply synchronized by an unobserved seasonal variable (Cobey & Baskerville 2016; Deyle *et al.* 2016a). In the first null model (“seasonal null model”), we preserved the seasonal signal in the null, but randomized the interannual anomalies, and compared model performance with the

Date: December 19, 2019

245 true time series (Deyle *et al.* 2016a). In the second, more conservative null model  
246 (“Ebisuzaki null model”), we conserved any serial correlation (beyond seasonal) and  
247 randomized the phases of Fourier transformed time series, and compared model  
248 performance with the true time series (Ebisuzaki 1997).

249 We also repeated the CCM method in the nonsensical, reverse-causal direction (e.g.,  
250 to test whether incidence drives climate) as a control for potential spurious  
251 relationships generated by non-causal covariation (e.g., due to seasonality). This  
252 addresses the issue of synchrony, in which CCM can indicate bidirectional causality  
253 when one direction is false or nonsensical (Baskerville & Cobey 2017; Sugihara *et al.*  
254 2017).

## 255 **EDM: Forecast improvement**

256 We examined the predictive power of each driver—or combination of drivers—on  
257 dengue incidence by assessing how well we can predict dengue dynamics using  
258 temperature, rainfall, and susceptibles index. We used a combination of univariable  
259 SSR (i.e., with incidence data) and multivariable SSR to determine the improvement  
260 of forecasting (using simplex projection) when including each driver or combination  
261 of drivers (Dixon *et al.* 1999; Deyle *et al.* 2013, 2016a).

262 We investigated the potential forecast improvement of dengue incidence using  
263 temperature, rainfall, susceptibles index, and their combined effect. In addition, we  
264 investigated the predictive power of dengue incidence using multivariable SSR with

Date: December 19, 2019

just the potential driver variables: temperature, rainfall, and susceptibles index (see Supporting Information).

## EDM: Scenario exploration

In nonlinear systems, drivers generally do not have a constant effect. The effect is state-dependent—the strength and possibly the direction of the effect depends on the current state of the system. Scenario exploration with multivariable EDM allowed us to assess the effect of a small change in temperature or rainfall on dengue incidence, across different states of the system. The outcome of these small changes allowed us to deduce the relationship between each climate driver and dengue incidence and how they depend on the system state. For each time step  $t$  we used S-maps (Sugihara 1994; Deyle *et al.* 2016a) to predict dengue incidence using a small increase  $(+\Delta X/2)$  and a small decrease  $(-\Delta X/2)$  of the observed value of driver  $X(t)$  (temperature or rainfall). For each putative climate driver, the difference in dengue predictions between these small changes is  $\Delta Y = Y(t+1) \left[ X(t) + \frac{\Delta X(t)}{2} \right] - Y(t+1) \left[ X(t) - \frac{\Delta X(t)}{2} \right]$ , where  $Y(t+1)$  is a function of  $X$  and all other state variables, and we used  $\Delta Y/\Delta X$  to approximate the effect of driver  $X$  at time  $t$ . We repeated this over all time steps in our time series data for both temperature and rainfall to recover their approximate relationships with dengue incidence at different states of the system. Scenario exploration analyses were repeated across several model parameterizations to address potential sensitivity to parameter settings (see Supporting Information).

Date: December 19, 2019

## RESULTS

### Detecting drivers

EDM showed that temperature, rainfall, and susceptibles index drive dengue incidence since the convergence criterion was met (Kendall's  $\tau > 0$ ,  $p < 0.01$ ) in all three CCM cases (Figure 3a–c). Rainfall and susceptibles index were significant drivers of dengue incidence beyond seasonality, as their effects were distinguishable from seasonal and Ebisuzaki null models (Figures 3b, c and S8b, c;  $p < 0.05$ ). This implies significant causal effects of both rainfall and susceptible population size on dengue, which are not obscured by a confounder with a periodic signal. However, temperature was not a significant driver beyond seasonality (Figures 3a and S8a;  $p > 0.05$ ). This implies we cannot rule out the possibility that the apparent forcing of temperature on dengue is due to a confounder with a seasonal signal. However, if there is no such confounder, then the seasonal trend in temperature, which accounts for most temperature variation in San Juan, drives the seasonal trend observed in dengue incidence (i.e., seasonality of temperature drives seasonality of dengue). Compared to the other drivers, the predictive skill of the temperature null model was relatively high (Figure 3a), suggesting that temperature seasonality in the null model was predictive. This further supports the notion that seasonal temperature may be driving dengue dynamics.

As expected, EDM tests for causality in the nonsensical directions—incidence driving temperature or rainfall—were not significant (i.e., no convergence; Figure

Date: December 19, 2019

S7, black lines). This further supports that temperature and rainfall drive dengue incidence, because their causal relationships were not confounded by spurious bidirectionality. Further, the null models for the nonsensical directions of causality (Figure S7, grey lines) also displayed no convergence (completely flat), as expected (i.e., seasonality of dengue incidence does not drive seasonality of temperature or rainfall). However, seasonality (or any periodicity) of temperature, rainfall and susceptibles index drive dengue dynamics, shown by convergence of the seasonal and Ebisuzaki null models (grey lines in Figures 3 and S8).

### **Predictive power of drivers**

Dengue incidence was highly predictable using univariable SSR of incidence data alone (Adjusted  $R^2 = 0.8922$ ,  $\rho = 0.9446$ ; Figure 4a). The predictive power of dengue incidence improved only slightly when temperature, rainfall, and susceptibles index were added in a multivariable SSR model (Adjusted  $R^2 = 0.8927$ ,  $\rho = 0.9448$ ; Figure 4d). These results suggest that dengue incidence time series contain information about these drivers, resulting in the high predictability of the attractor in univariable SSR (Figure 4a).

Dengue dynamics were also highly predictable using only the driver time series (i.e., temperature, rainfall, and susceptibles index) in a multivariable SSR model (Adjusted  $R^2 = 0.5044$ ,  $\rho = 0.7102$ ; Figure 4c), where timing and magnitude of epidemics were captured reasonably well. However, the model using only temperature and rainfall data did not predict dengue incidence as well (Adjusted  $R^2 = 0.0533$ ,  $\rho = 0.2309$ ; Figure 4b). Thus, adding the susceptibles index increases



Date: December 19, 2019

predictive power compared to climate variables alone, particularly for predicting the magnitude of outbreaks (Figure 4c). However, temperature and rainfall did capture the timing (seasonality) of the epidemics (Figure 4b). This supports the notion that seasonality of temperature and rainfall is important for explaining the seasonality of dengue, and that susceptible population size is important for determining epidemic size. All SSR models (Figure 4a–d) had significant ( $p < 0.001$ ) F statistics  $\gg 1$  from ANOVA, rejecting the null hypothesis (i.e., no relationship between predicted and observed dengue incidence).

### **State-dependent functional responses**

By investigating the rate of change of dengue incidence as a function of climate across system states, we found that temperature had a small *positive* median effect (0.0035, Wilcox  $p < 0.001$ ) on dengue incidence. A positive effect is expected (Mordecai *et al.* 2017) for the temperature range in Puerto Rico (Figure S9, black dashed lines), although the effect was occasionally much stronger, both positive and negative (Figure 5a, b). The large negative effects occurred only at the highest temperature values (as predicted by mechanistic models of temperature-dependent transmission), reinforced by a lower quantile regression with a strongly negative slope (Figure 5b, bottom dashed red line). However, positive effects occurred across the whole temperature range.

Rainfall had a small *negative* median effect ( $-0.0022$ , Wilcox  $p < 0.001$ ), but occasionally had very large negative effects (Figure 5a, c). These large, negative effects of rainfall on dengue occurred when there was less than 100 mm of rain per

Date: December 19, 2019

week (Figure 5c), in line with expectations that *low* amounts of rainfall could lead to *high* number of dengue cases, since people tend to store water in containers during periods of drought, enabling mosquitoes to breed (Oliveira-lima *et al.* 2000). There are also small positive effects of rainfall on dengue (Figure 5c), suggesting that overall the results showed competing effects of low-moderate rain providing standing water for mosquito breeding and humans storing standing water where mosquitoes can breed when there is drought or low rain.

The results on climate effects suggest that the strength and direction of the effects of climate on dengue dynamics depend on the state of the system. A potential cause of state-dependent climate effects on dengue dynamics is the variation in the susceptible population size over time (Figure 6a, b). Outbreaks do not occur when there are too few susceptible people to get infected. As expected, when the susceptible population size was small ( $\tilde{\lambda} < 0.85$ ) incidence was insensitive to climate (Figure 6c, e). By contrast, when the susceptible population size was large ( $\tilde{\lambda} > 0.85$ ), temperature and rainfall effects on dengue incidence appeared (Figure 6d, f). The gradual increase and decrease of the rate of change of dengue as a function of temperature (Figure 6d, red solid lines) aligned well with the sigmoidal part (Figure S9, black dashed lines representing the temperature range in our study) of the unimodal temperature response curve (assuming transmission primarily by *Ae. aegypti*) developed previously (Mordecai *et al.* 2017). This is an important finding, since evidence of climate functional responses for disease dynamics is rare due to the difficulty of obtaining appropriately informative field

Date: December 19, 2019

373 data. It is possible that if we had temperature data ranging across a larger  
374 spectrum—possibly by assembling data across multiple climates—that the  
375 empirical functional response derived from EDM would also look unimodal.

Date: December 19, 2019

## DISCUSSION

EDM can identify causal drivers, quantify their predictive power, and approximate functional responses in nonlinear, state-dependent ecological systems, which few other methods can do. Infectious disease dynamics are often seasonal, adding another layer of complexity. Here, we used seasonal null models and a well-studied ecological system to disentangle nonlinear and interactive mechanisms driving disease dynamics. First, EDM detected rainfall, susceptible population size, and plausibly temperature (mostly via its seasonality) as drivers of dengue incidence. The seasonal variation in incidence was more attributed to climate, while the interannual variation in incidence was more explained by the susceptible population (Figure 3). Second, EDM provided a predictive model based on these three drivers that had a reasonably good fit to dengue incidence data ( $R^2 = 0.50$ ,  $\rho = 0.71$ ; Figure 4c). Dengue dynamics were also highly predictable from incidence data alone ( $R^2 = 0.89$ ,  $\rho = 0.94$ ; Figure 4a); thus, robust to missing state variables. This implies that EDM methods could be powerful for forecasting epidemics, provided that surveillance efforts continue to report weekly case data. Third, EDM revealed that climate effects on dengue appeared once the susceptible population size exceeded a threshold ( $\tilde{\lambda} > 0.85$ ; Figure 6).

The fact that climate effects are observed before the onset of an outbreak, when  $\tilde{\lambda} = 1$  (Rypdal & Sugihara 2019), suggests that rainfall, and possibly temperature, have an effect on the timing of an impending epidemic. Thus, although rainfall and temperature might not influence the dynamics of dengue during an inter-outbreak

Date: December 19, 2019

period when the susceptible population size is small, climate could act as a catalyst to spark an epidemic once the susceptible population size is large enough. This resonates with the notion that climate could drive the force of infection,  $\beta$ , thus influencing the susceptibles index,  $\lambda$  (Rypdal & Sugihara 2019). The timing of an outbreak, when  $\lambda \geq 0$  (or in the discrete case when  $\tilde{\lambda} \geq 1$ ), could be attributed to the changes in  $\beta$  caused by seasonal climatic drivers (Rypdal & Sugihara 2019). Further, seasonality of temperature and rainfall had higher predictive skill than seasonality of susceptibles index (Figures 3 and S8, grey solid lines); however, adding susceptibles index dramatically improved dengue forecasts due to more accurate epidemic magnitudes (Figure 4b, c). Thus, climate may be mostly responsible for the *timing* of seasonal epidemics, while susceptible population size may mostly determine the epidemic *magnitude*. Using the same dataset, Johnson *et al.* (2018) found that mechanistic models could predict the timing of seasonal epidemics, but that a phenomenological machine learning component was needed to capture interannual variation in epidemic magnitude. Our work suggests that the unobserved size of the susceptible population was a key missing link for predicting magnitude variation across years.

We showed that susceptible population size is an important modifier of climate effects on dengue (Figure 6). This climate–susceptible population interdependence might be generalizable across other infectious diseases. For example, for influenza dynamics, population density in cities—potentially a proxy for susceptible population density—modulated climate effects on disease transmission (Dalziel *et al.* 2018). Given complex immune and serotype dynamics of dengue (Katzelnick *et*

Date: December 19, 2019

421 *al.* 2017b), total population density might not work as a proxy for the susceptible  
 422 population density in dengue dynamics. It has been difficult for previous  
 423 mechanistic models to capture susceptible dynamics for dengue. By inferring the  
 424 susceptibles index from incidence data (Rypdal & Sugihara 2019), we were able to  
 425 capture the strong influence of the susceptible population size on dengue dynamics,  
 426 which in turn moderated the effect of climate drivers on dengue dynamics. We  
 427 showed that climate–dengue relationships were only detectable once we accounted  
 428 for seasonal and interannual variation in susceptible availability (Figure 6d, f). This  
 429 is expected from theory (Kermack & McKendrick 1927; Xu *et al.* 2017), but  
 430 demonstrating it empirically is a unique contribution of this study.

431 Even when accounting for susceptible availability, the effects of temperature and  
 432 rainfall on dengue were still strongly state-dependent (Figure 6d, f). The remaining  
 433 variation in temperature and rainfall effects on dengue—given that the susceptible  
 434 population is large enough for an outbreak—may be partially explained by variation  
 435 in temperature and rainfall over time and space that is not captured by weekly  
 436 climate averages, and by interactions between temperature and rainfall. Further,  
 437 any subtle lagged effects of temperature or rainfall on dengue are not captured by a  
 438 single ecological lag (a 9-week or an averaged 3–9-week lag, respectively). We  
 439 expect multiple time lags to operate based on the different ecological processes that  
 440 generate reported cases: mosquito population growth, mosquitoes getting infected  
 441 and biting susceptible humans, development of symptoms, and care-seeking. The  
 442 ecological lags are simple proxies for this complex set of ecological processes.

Date: December 19, 2019

EDM is like any other quantitative method in that it is appropriately applied when its assumptions are met. EDM is sensitive to stochasticity and synchrony (e.g., via seasonality), so it is important to first determine whether a system is governed by deterministic dynamics, and then to use null models that account for synchrony (Ebisuzaki 1997; Deyle *et al.* 2016a; Chang *et al.* 2017). Nevertheless, EDM is a useful approach for testing causality between hypothesized drivers and response variables in a dynamic system, and recent work allows EDM to perform well with stochasticity (Cenci & Saavedra 2018; Cenci *et al.* 2019). To infer strongly supported causal relationships, it is also important to consider the mechanistic hypotheses underlying the system. For dengue, there are complementary lines of evidence about the drivers of incidence from experimental studies (Watts *et al.* 1987; Lambrechts *et al.* 2011), mechanistic models parameterized with data (Otero *et al.* 2006; Mordecai *et al.* 2017), phenomenological studies across settings (Johansson *et al.* 2009; Hii *et al.* 2012; Ibarra *et al.* 2013), and EDM from this study. In particular, the 19-year weekly time series dataset used here has been investigated using multiple methods (Johansson *et al.* 2019); however, most of these methods are either not mechanistic or include simple mechanisms that do not account for the joint influence of climate and susceptible dynamics. EDM gives us the opportunity to infer mechanisms, and assess their support in other studies using different approaches. In sum, EDM has limitations, but the limitations of other approaches are at least as great, and may not capture state-dependent effects. When combined with supporting evidence from other approaches, EDM can be a powerful test for

Date: December 19, 2019

465 causality, prediction, and functional relationships between drivers and response  
466 variables.

467 Connecting climate and dengue at the population level is challenging, because causal  
468 relationships are likely to be nonlinear and state-dependent. Thus, a toolbox of  
469 rigorous methods for testing hypotheses, understanding mechanisms, and making  
470 predictions is essential for understanding disease dynamics in complex, natural  
471 populations. Ultimately, understanding how climate-driven vector-borne diseases  
472 are influenced by other variables, such as susceptible population size, is important  
473 for optimizing vector control under critical conditions where climate might spark  
474 epidemics. EDM is most appropriate for deterministic systems, which are common  
475 in disease ecology. The mechanisms inferred from EDM could be applied to  
476 understand and predict future ecological responses to changing environments,  
477 including dengue epidemics in a world undergoing global change.



Date: December 19, 2019

## 478 **ACKNOWLEDGEMENTS**

479 We thank Giulio De Leo, Marcus Feldman, Dmitri Petrov, and members of the  
 480 Fukami, Mordecai, Peay, and Sugihara labs for helpful feedback. NN was supported  
 481 by the Bing Fellowship in Honor of Paul Ehrlich. ERD and GS were supported by the  
 482 National Science Foundation (NSF) DEB-1655203, NSF-ABI-1667584, DoD-Strategic  
 483 Environmental Research and Development Program (SERDP) 15 RC-2509; Lenfest  
 484 Foundation Award 00028335 and the McQuown Chair in Natural Sciences,  
 485 University of California, San Diego. MSS and EAM were supported by an NSF Ecology  
 486 and Evolution of Infectious Diseases grant (DEB-1518681). EAM was also supported  
 487 by an NSF Rapid Response Research grant (RAPID 1640780), the Stanford  
 488 University Woods Institute for the Environment Environmental Ventures Program,  
 489 the Hellman Faculty Fellowship, and the Terman Fellowship. AJM was supported by  
 490 an NSF Postdoctoral Research Fellowship in Biology (1611767). MLC was supported  
 491 by the Lindsay Family E-IPER Fellowship and Illich-Sadowsky Interdisciplinary  
 492 Graduate Fellowship.

## 493 **AUTHORSHIP**

494 NN, EAM, GS, and MR conceived the idea for the study and designed the analyses.  
 495 MR inferred the proxy for susceptible population size time series. NN, ERD, MSS,  
 496 AJM, and MLC performed the analyses. NN wrote the first draft of the manuscript. All  
 497 authors contributed to manuscript revisions and gave approval for publication.

Date: December 19, 2019

## 498 REFERENCES

- 499 Anderson, R.M. & May, R.M. (1979). Population biology of infectious diseases: Part I.  
500 *Nature*.
- 501 Baskerville, E.B. & Cobey, S. (2017). Does influenza drive absolute humidity? *Proc.*  
502 *Natl. Acad. Sci.*, 114, 201700369.
- 503 Bhatt, S., Gething, P.W., Brady, O.J., Messina, J.P., Farlow, A.W., Moyes, C.L., *et al.*  
504 (2013). The global distribution and burden of dengue. *Nature*, 496, 504–507.
- 505 Brady, O.J., Gething, P.W., Bhatt, S., Messina, J.P., Brownstein, J.S., Hoen, A.G., *et al.*  
506 (2012). Refining the Global Spatial Limits of Dengue Virus Transmission by  
507 Evidence-Based Consensus. *PLoS Negl. Trop. Dis.*, 6, e1760.
- 508 Cenci, S. & Saavedra, S. (2018). Uncertainty quantification of the effects of biotic  
509 interactions on community dynamics from nonlinear time-series data. *J. R. Soc.*  
510 *Interface*, 15.
- 511 Cenci, S., Sugihara, G. & Saavedra, S. (2019). Regularized S-map for inference and  
512 forecasting with noisy ecological time series. *Methods Ecol. Evol.*, 2041–  
513 210X.13150.
- 514 Chang, C.W., Ushio, M. & Hsieh, C. hao. (2017). Empirical dynamic modeling for  
515 beginners. *Ecol. Res.*, 32, 785–796.
- 516 Chen, S.C., Liao, C.M., Chio, C.P., Chou, H.H., You, S.H. & Cheng, Y.H. (2010). Lagged  
517 temperature effect with mosquito transmission potential explains dengue  
518 variability in southern Taiwan: Insights from a statistical analysis. *Sci. Total*

Date: December 19, 2019

519        *Environ.*, 408, 4069–4075.

520    Cobey, S. & Baskerville, E.B. (2016). Limits to causal inference with state-space  
521        reconstruction for infectious disease. *PLoS One*, 11, 1–22.

522    Cummins, B., Gedeon, T. & Spendlove, K. (2015). On the Efficacy of State Space  
523        Reconstruction Methods in Determining Causality. *SIAM J. Appl. Dyn. Syst.*, 14,  
524        335–381.

525    Dalziel, B.D., Kissler, S., Gog, J.R., Viboud, C., Bjørnstad, O.N., Metcalf, C.J.E., *et al.*  
526        (2018). Urbanization and humidity shape the intensity of influenza epidemics  
527        in U.S. cities. *Science (80-. )*, 362, 75–79.

528    Deyle, E.R., Fogarty, M., Hsieh, C., Kaufman, L., Maccall, A.D. & Munch, S.B. (2013).  
529        Predicting climate effects on Pacific sardine. *Proc. Natl. Acad. Sci. U. S. A.*, 110,  
530        6430–6435.

531    Deyle, E.R., Maher, M.C., Hernandez, R.D., Basu, S. & Sugihara, G. (2016a). Global  
532        environmental drivers of influenza. *Proc. Natl. Acad. Sci.*, 113, 13081–13086.

533    Deyle, E.R., May, R.M., Munch, S.B. & Sugihara, G. (2016b). Tracking and forecasting  
534        ecosystem interactions in real time. *Proc. R. Soc. B Biol. Sci.*, 283.

535    Deyle, E.R. & Sugihara, G. (2011). Generalized theorems for nonlinear state space  
536        reconstruction. *PLoS One*, 6.

537    Dixon, P.A., Milicich, M.J. & Sugihara, G. (1999). Episodic fluctuations in larval supply.  
538        *Science (80-. )*, 283, 1528–1530.

539    Ebisuzaki, W. (1997). A method to estimate the statistical significance of a

Date: December 19, 2019

540 correlation when the data are serially correlated. *J. Clim.*, 10, 2147–2153.

541 Erlanger, T.E., Keiser, J. & Utzinger, J. (2008). Effect of dengue vector control  
542 interventions on entomological parameters in developing countries: A  
543 systematic review and meta-analysis. *Med. Vet. Entomol.*

544 Grziwotz, F., Strauß, J.F., Hsieh, C. & Telschow, A. (2018). Empirical Dynamic  
545 Modelling Identifies different Responses of *Aedes Polynesiensis*  
546 Subpopulations to Natural Environmental Variables. *Sci. Rep.*, 8, 16768.

547 Hii, Y.L., Zhu, H., Ng, N., Ng, L.C. & Rocklöv, J. (2012). Forecast of Dengue Incidence  
548 Using Temperature and Rainfall. *PLoS Negl. Trop. Dis.*, 6, e1908.

549 Ibarra, A.M.S., Ryan, S.J., Beltrá N, E., Mejía, R.L., Silva, M. & Muñ Oz, N. (2013).  
550 Dengue Vector Dynamics (*Aedes aegypti*) Influenced by Climate and Social  
551 Factors in Ecuador: Implications for Targeted Control. *PLoS One*, 8.

552 Johansson, M.A., Apfeldorf, K.M., Dobson, S., Devita, J., Buczak, A.L., Baugher, B., *et al.*  
553 (2019). An open challenge to advance probabilistic forecasting for dengue  
554 epidemics. *Proc. Natl. Acad. Sci.*, 116, 201909865.

555 Johansson, M.A., Dominici, F. & Glass, G.E. (2009). Local and global effects of climate  
556 on dengue transmission in Puerto Rico. *PLoS Negl. Trop. Dis.*, 3, e382.

557 Johansson, M.A., Reich, N.G., Hota, A., Brownstein, J.S. & Santillana, M. (2016).  
558 Evaluating the performance of infectious disease forecasts: A comparison of  
559 climate-driven and seasonal dengue forecasts for Mexico. *Sci. Rep.*, 6, 33707.

560 Johnson, L.R., Gramacy, R.B., Cohen, J., Mordecai, E., Murdock, C., Rohr, J., *et al.*  
561 (2018). Phenomenological forecasting of disease incidence using

Date: December 19, 2019

562 heteroskedastic gaussian processes: A dengue case study. *Ann. Appl. Stat.*, 12,  
563 27–66.

564 Katzelnick, L.C., Coloma, J. & Harris, E. (2017a). Dengue: knowledge gaps, unmet  
565 needs, and research priorities. *Lancet Infect. Dis.*, 17, e88–e100.

566 Katzelnick, L.C., Gresh, L., Halloran, M.E., Mercado, J.C., Kuan, G., Gordon, A., *et al.*  
567 (2017b). Antibody-dependent enhancement of severe dengue disease in  
568 humans. *Science (80-. )*, 358, 929–932.

569 Kermack, W.O. & McKendrick, A.G. (1927). A Contribution to the Mathematical  
570 Theory of Epidemics. *Proc. R. Soc. A Math. Phys. Eng. Sci.*, 115, 700–721.

571 Kilpatrick, A.M. & Randolph, S.E. (2012). Drivers, dynamics, and control of emerging  
572 vector-borne zoonotic diseases. *Lancet*.

573 Koenraadt, C.J.M. & Harrington, L.C. (2008). Flushing effect of rain on container-  
574 inhabiting mosquitoes *Aedes aegypti* and *Culex pipiens* (Diptera: Culicidae). *J.*  
575 *Med. Entomol.*, 45, 28–35.

576 Kraemer, M.U.G., Perkins, T.A., Cummings, D.A.T., Zakar, R., Hay, S.I., Smith, D.L., *et al.*  
577 (2015a). Big city, small world: Density, contact rates, and transmission of  
578 dengue across Pakistan. *J. R. Soc. Interface*, 12.

579 Kraemer, M.U.G., Reiner, R.C., Brady, O.J., Messina, J.P., Gilbert, M., Pigott, D.M., *et al.*  
580 (2019). Past and future spread of the arbovirus vectors *Aedes aegypti* and  
581 *Aedes albopictus*. *Nat. Microbiol.*, 4, 854–863.

582 Kraemer, M.U.G., Sinka, M.E., Duda, K.A., Mylne, A.Q.N., Shearer, F.M., Barker, C.M., *et*  
583 *al.* (2015b). The global distribution of the arbovirus vectors *Aedes aegypti* and

Date: December 19, 2019

584 Ae. Albopictus. *Elife*, 4.

585 Lambrechts, L., Paaijmans, K.P., Fansiri, T., Carrington, L.B., Kramer, L.D., Thomas,  
586 M.B., *et al.* (2011). Impact of daily temperature fluctuations on dengue virus  
587 transmission by Aedes aegypti. *Proc. Natl. Acad. Sci. U. S. A.*, 108, 1–6.

588 Liu-Helmersson, J., Stenlund, H., Wilder-Smith, A. & Rocklöv, J. (2014). Vectorial  
589 capacity of Aedes aegypti: Effects of temperature and implications for global  
590 dengue epidemic potential. *PLoS One*, 9.

591 McLeod, A.I. (2011). Kendall: Kendall rank correlation and Mann-Kendall trend test.

592 Mordecai, E.A., Caldwell, J.M., Grossman, M.K., Lippi, C.A., Johnson, L.R., Neira, M., *et*  
593 *al.* (2019). Thermal biology of mosquito-borne disease. *Ecol. Lett.*, ele.13335.

594 Mordecai, E.A., Cohen, J.M., Evans, M. V., Gudapati, P., Johnson, L.R., Lippi, C.A., *et al.*  
595 (2017). Detecting the impact of temperature on transmission of Zika, dengue,  
596 and chikungunya using mechanistic models. *PLoS Negl. Trop. Dis.*, 11,  
597 e0005568.

598 Morin, C.W., Comrie, A.C. & Ernst, K. (2013). Climate and dengue transmission:  
599 Evidence and implications. *Environ. Health Perspect.*

600 Morin, C.W., Monaghan, A.J., Hayden, M.H., Barrera, R. & Ernst, K. (2015).  
601 Meteorologically driven simulations of dengue epidemics in San Juan, PR. *PLoS*  
602 *Negl. Trop. Dis.*, 9, e0004002.

603 Oliveira-lima, W., Hodgson, J.C., Pontes, R.J.S. & Freeman, J. (2000). Vector densities  
604 that potentiate dengue outbreaks in a Brazilian city. *Trop. Med.*, 62, 378–383.

Date: December 19, 2019

- 605 Otero, M., Solari, H.G. & Schweigmann, N. (2006). A stochastic population dynamics  
606 model for *Aedes aegypti*: Formulation and application to a city with temperate  
607 climate. *Bull. Math. Biol.*, 68, 1945–1974.
- 608 Ryan, S.J., Carlson, C.J., Mordecai, E.A. & Johnson, L.R. (2019). Global expansion and  
609 redistribution of *Aedes*-borne virus transmission risk with climate change.  
610 *PLoS Negl. Trop. Dis.*, 13, e0007213.
- 611 Rypdal, M. & Sugihara, G. (2019). Inter-outbreak stability reflects the size of the  
612 susceptible pool and forecasts magnitudes of seasonal epidemics. *Nat.*  
613 *Commun.*, 10, 2374.
- 614 Sridhar, S., Luedtke, A., Langevin, E., Zhu, M., Bonaparte, M., Machabert, T., *et al.*  
615 (2018). Effect of Dengue Serostatus on Dengue Vaccine Safety and Efficacy. *N.*  
616 *Engl. J. Med.*, 379, 327–340.
- 617 Sugihara, G. (1994). Nonlinear Forecasting for the Classification of Natural Time  
618 Series. *Philos. Trans. R. Soc. A Math. Phys. Eng. Sci.*, 348, 477–495.
- 619 Sugihara, G., Deyle, E.R. & Ye, H. (2017). Reply to Baskerville and Cobey:  
620 Misconceptions about causation with synchrony and seasonal drivers. *Proc.*  
621 *Natl. Acad. Sci.*, 114, 201700998.
- 622 Sugihara, G., May, R., Ye, H., Hsieh, C., Deyle, E., Fogarty, M., *et al.* (2012). Detecting  
623 Causality in Complex Ecosystems. *Science (80-. )*, 338, 496–500.
- 624 Sugihara, G. & May, R.M. (1990). Nonlinear forecasting as a way of distinguishing  
625 chaos from measurement error in time series. *Nature*.
- 626 Takens, F. (1981). Detecting strange attractors in turbulence. In: *Dynamical Systems*

Date: December 19, 2019

627        *and Turbulence, Warwick 1980, Lecture Notes in Mathematics* (eds. Rand, D. &  
628        Young, L.-S.). Springer-Verlag, pp. 366–381.

629        Thai, K.T.D. & Anders, K.L. (2011). The role of climate variability and change in the  
630        transmission dynamics and geographic distribution of dengue. *Exp. Biol. Med.*,  
631        236, 944–954.

632        Tran, A., L'Ambert, G., Lacour, G., Benoît, R., Demarchi, M., Cros, M., *et al.* (2013). A  
633        rainfall- and temperature-driven abundance model for *Aedes albopictus*  
634        populations. *Int. J. Environ. Res. Public Health*, 10, 1698–1719.

635        Trapletti, A. & Hornik, K. (2018). tseries: Time Series Analysis and Computational  
636        Finance.

637        Watts, D.M., Burke, D.S., Harrison, B.A., Whitmire, R.E. & Nisalak, A. (1987). Effect of  
638        temperature on the vector efficiency of *Aedes aegypti* for dengue 2 virus. *Am. J.*  
639        *Trop. Med. Hyg.*, 36, 143–152.

640        Xu, L., Stige, L.C., Chan, K.-S., Zhou, J., Yang, J., Sang, S., *et al.* (2017). Climate variation  
641        drives dengue dynamics. *Proc. Natl. Acad. Sci.*, 114, 113–118.

642        Ye, H., Clark, A., Deyle, E., Munch, S., Cai, J., Cowles, J., *et al.* (2018). rEDM:  
643        Applications of Empirical Dynamic Modeling from Time Series. R package  
644        version 0.7.1.

645



Date: December 19, 2019

## 646 FIGURES

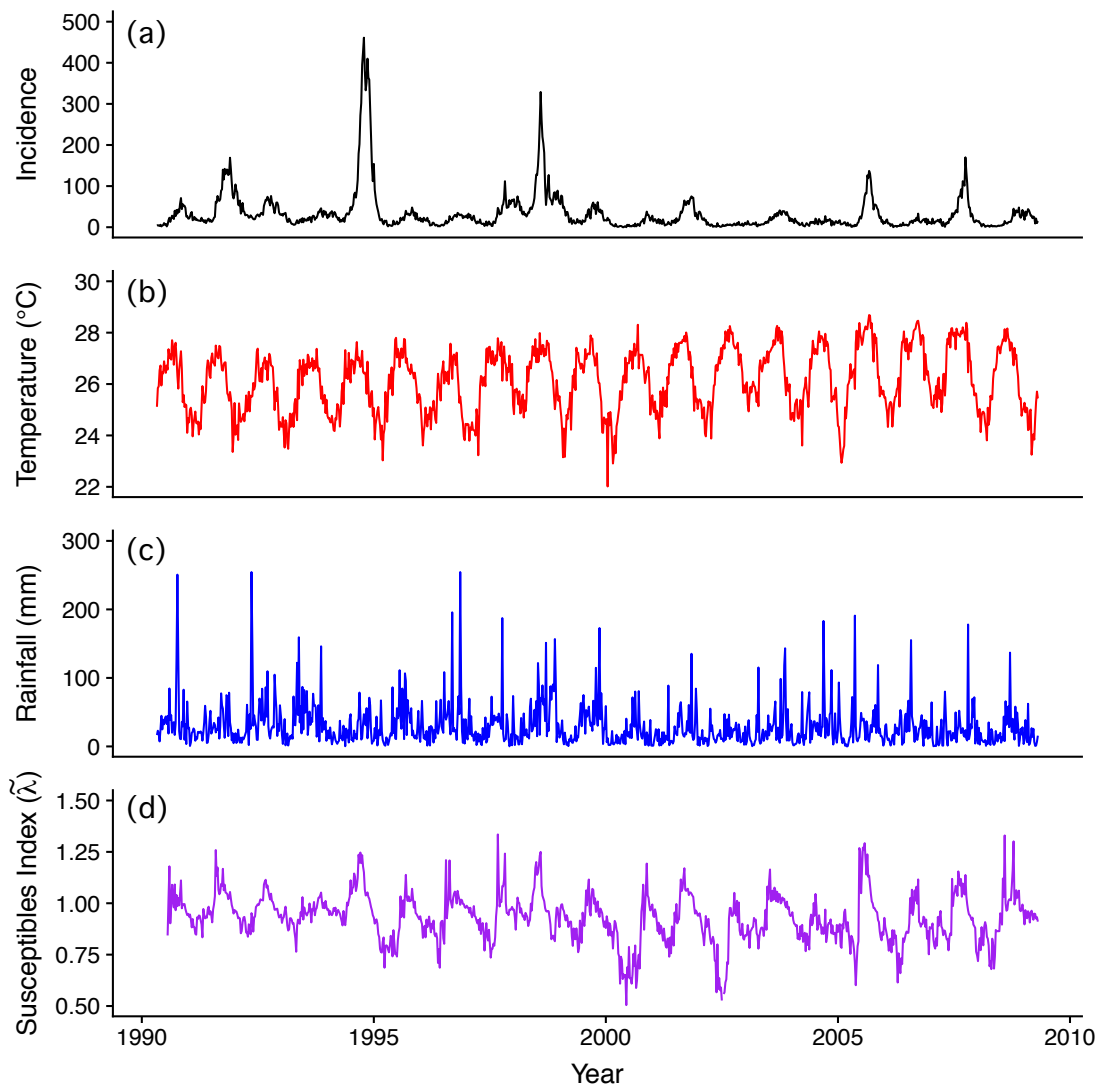

647

648 **Figure 1. Time series data.** Time series (1990–2009) of (a) weekly dengue  
649 incidence (i.e., total number of cases per week), (b) weekly average temperature, (c)  
650 total weekly rainfall, and (d) a proxy for susceptible population size (see Supporting  
651 Information for details) in San Juan, Puerto Rico.

Date: December 19, 2019

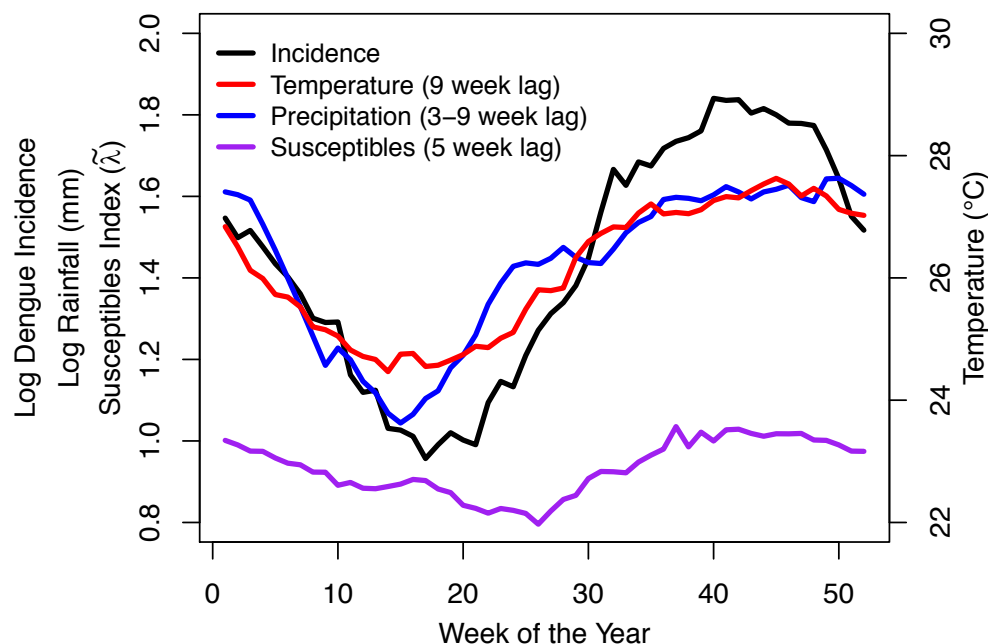

**Figure 2. Seasonal trends and lags of dengue incidence and its drivers.** The

strong seasonal signal of dengue cases and other variables suggests potential causal lags between dengue incidence and temperature, rainfall, or proxy for the susceptible population size. The lines represent interannual averages for each week-of-year of dengue incidence (black), temperature lagged 9 weeks forward in time (red), average rainfall over the preceding 3–9 weeks and lagged 3 weeks forward in time (blue), and a proxy for susceptible population size lagged 5 weeks forward in time (purple).

Date: December 19, 2019

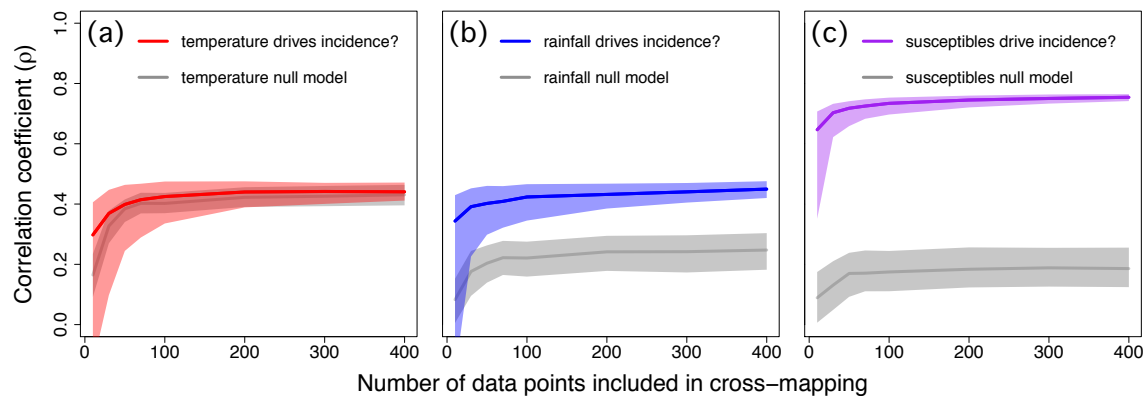

**Figure 3. Susceptible population size and climate drive dengue incidence.**

Cross-mapping between dengue incidence and potential drivers—temperature with a 9-week lag (a; red), rainfall with an averaged 3–9-week lag (b; blue), and proxy for susceptible population size ( $\tilde{\lambda}$ ) with a 5 week lag (c; purple)—display significant (Kendall's test  $\tau > 0$ ;  $p < 0.01$ ) convergence in cross-mapping skill (i.e.,  $\rho$  increases and reaches a flat asymptote) as the number of time series data points increases (sign of causality). Cross-mapping skill is the Pearson's correlation coefficient,  $\rho$ , between predicted driver values using the univariable state space reconstruction of the response variable, and the observed driver values. Rainfall and susceptibles index showed significant forcing above and beyond seasonal signal ( $p < 0.05$ ), because cross-mapping of the true time series (blue and purple) are distinguishable from their respective null models (grey). The red, blue and purple shaded regions represent the 0.025 and 0.975 quantiles of bootstrapped time series segments. The grey shaded regions represent the 0.025 and 0.975 quantiles of the seasonal null distributions obtained from 500 runs of randomized time series with conserved seasonal trends (Deyle *et al.* 2016a). The grey line represents the median of the null distribution.

Date: December 19, 2019

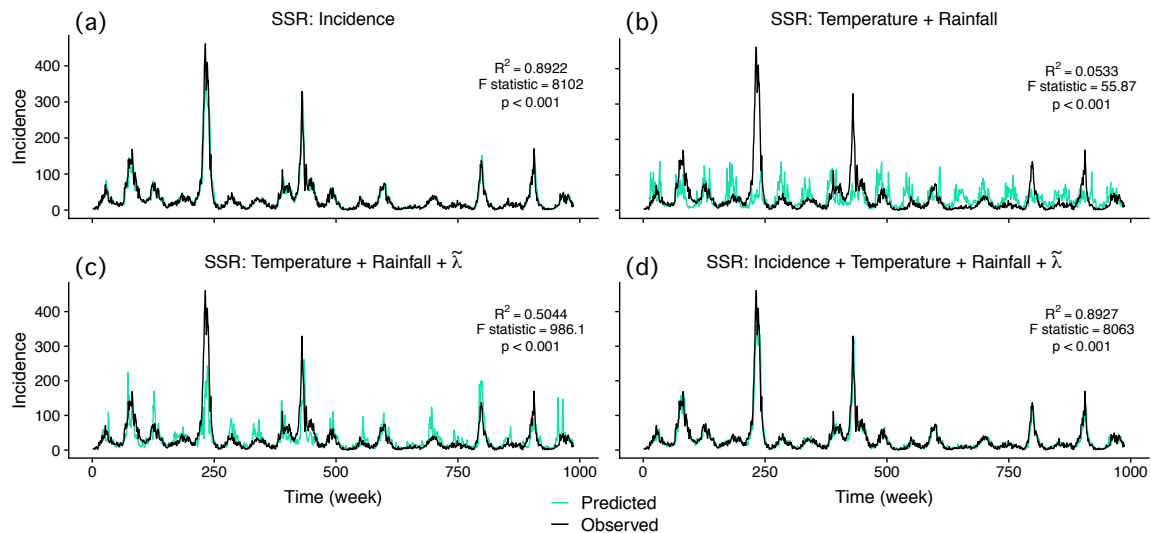

**Figure 4. Predictive power of climate and susceptibles index ( $\tilde{\lambda}$ ).** Forecasting results showing observed (black) and predicted (green) values of dengue incidence (cases per week) using state space reconstruction (SSR). Univariable SSR with just incidence data (a) illustrates that dengue incidence is strongly predictable ( $R^2 = 0.8922$ ,  $\rho = 0.9446$ ). Multivariable SSR using only temperature and rainfall (b) predicts dengue incidence less well ( $R^2 = 0.0533$ ,  $\rho = 0.2309$ ), especially the magnitudes of the outbreaks, but the seasonal trend is captured. Multivariable SSR using temperature, rainfall, and the proxy for susceptible population size  $\tilde{\lambda}$  (c) predicts incidence well ( $R^2 = 0.5044$ ,  $\rho = 0.7102$ ). Forecast predictions improve slightly ( $R^2 = 0.8927$ ,  $\rho = 0.9448$ ) when the drivers temperature, rainfall, and susceptibles index are added to incidence SSR (d). All  $R^2$  values represent adjusted  $R^2$ . All SSR models (Figure 4a–d) had significant ( $p < 0.001$ ) F statistics  $\gg 1$  based on ANOVA and the null hypothesis was rejected ( $H_0$ : there is no relationship between predicted and observed dengue incidence).

Date: December 19, 2019

Journal: Ecology Letters

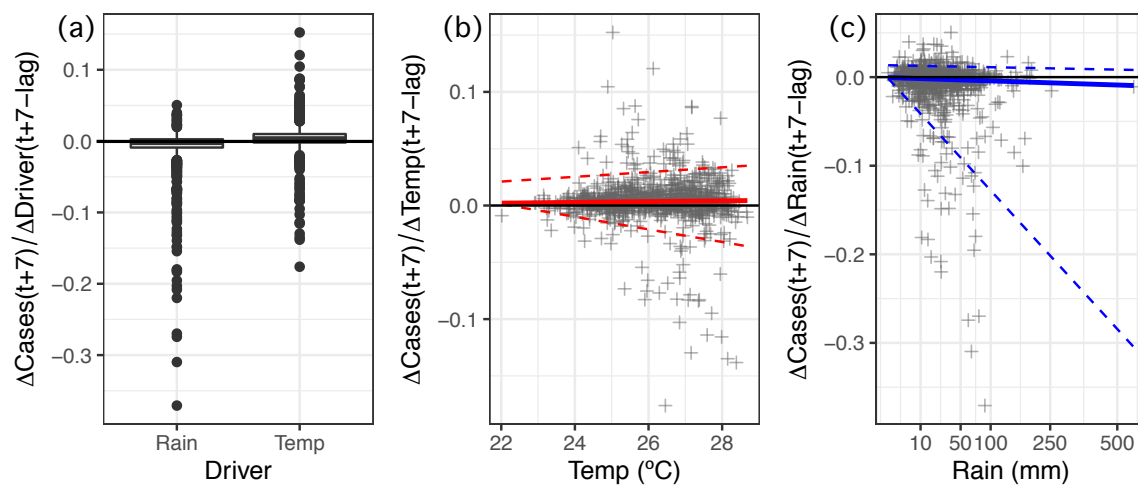

**Figure 5. Temperature and rainfall show mixed functional responses of dengue incidence.** Scenario exploration quantifies the variable effect of changes in drivers on dengue. Boxplots show that the median effects of rainfall (Rain) and temperature (Temp) are small (close to zero), but drivers occasionally have strong impacts (a). To investigate climate driver functional responses, we plotted the rate of change of dengue incidence as a function of temperature (b) and the rate of change of dengue incidence as a function of rainfall (c). Red and blue lines represent regression on the median for temperature and rainfall, respectively. The dashed red and blue lines represent regression on the 0.05 and 0.95 quantiles of temperature and rainfall, respectively. Temperature has an overall positive effect on dengue incidence (median regression line of the rate of change is positive), but can also have large negative and positive effects (a, b). Rainfall has an overall negative effect (median regression line of the rate of change is negative), but can also have small positive effects (a, c). Some of this effect variation can be explained by the susceptible population size (Figure 6).

Date: December 19, 2019

Journal: Ecology Letters

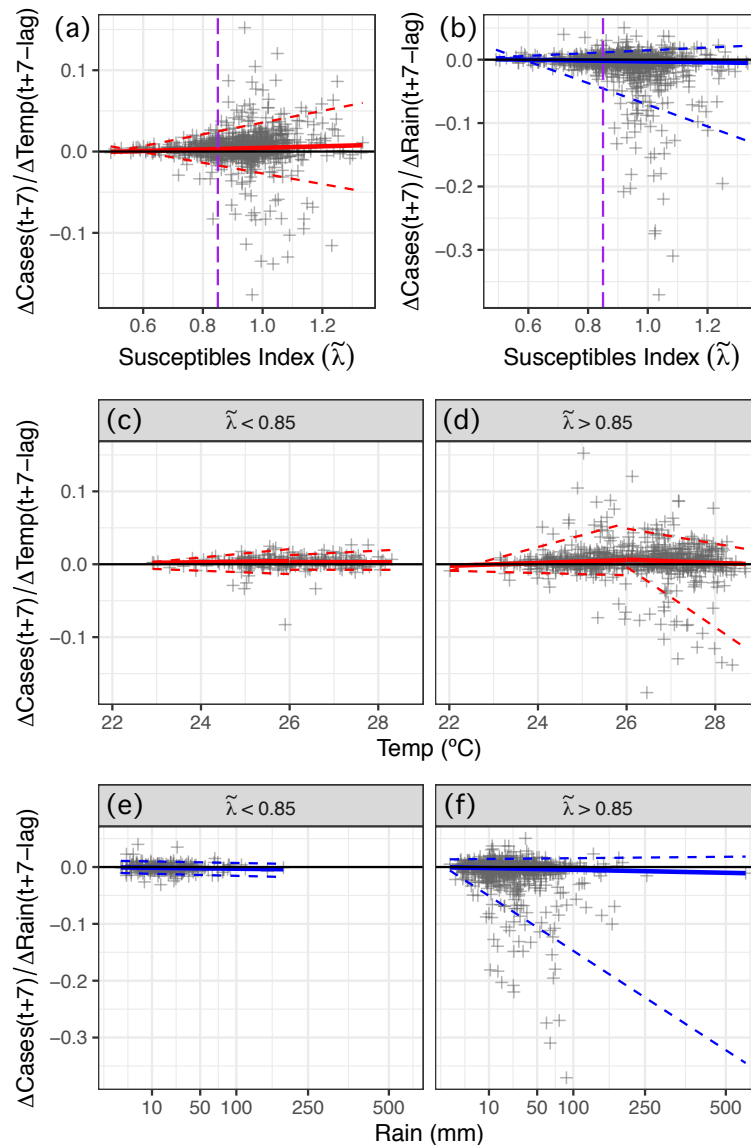

710

711 **Figure 6. Temperature and rainfall effects on dengue vary depending on the**  
712 **susceptible population size.** Effects of climate drivers (i.e., temperature and  
713 rainfall) are investigated in relation to the proxy for susceptible population size,  $\tilde{\lambda}$ .  
714 Plotting the effect of changes in temperature (a) and rainfall (b) against the  
715 susceptible population size shows that driver effects are split around the threshold  
716 of  $\tilde{\lambda} = 0.85$  (purple dashed line). The red and blue lines represent the median  
717 regression of temperature and rainfall effects, respectively (a–f). The dashed red

Date: December 19, 2019

Journal: Ecology Letters

718 and blue lines represent the 0.5 and 0.95 quantile regressions of temperature and  
 719 rainfall effects, respectively (a–f). Neither driver has an effect when there is not a  
 720 sufficiently large susceptible population size ( $\tilde{\lambda} < 0.85$ ) for an outbreak (c, e).  
 721 However, above a certain susceptible population size the climate effects are  
 722 observed: temperature with mostly a (possibly sigmoidal, see Figure S9) positive  
 723 effect (d) and rainfall with a negative effect (f). However, even when driver effects  
 724 are split at the evident threshold of  $\tilde{\lambda} = 0.85$  (c–f), there are still many occurrences  
 725 when the susceptible population size is sufficient large ( $\tilde{\lambda} > 0.85$ ) but temperature  
 726 and rainfall have no effect. In certain cases, temperature has even a negative effect  
 727 on dengue (d).
